# Supplementary material for: A polygenic score method boosted by non-additive models
Source: PubMed Central journal article supplement (PMC11522481; doi:10.1038/s41467-024-48654-x), 2024-05-29
Supplement: 41467_2024_48654_MOESM3_ESM.pdf [file 41467_2024_48654_MOESM3_ESM.pdf]

## **Description of Additional Supplementary Files**

**File name:** Supplementary Data 1

**Description:** Statistical Source Data for Supplementary Figures 4, 5, 7, 10-13, 18.

**File name:** Supplementary Data 2

**Description:** The proportion of non-additive SNVs in Non-additive GenoBoost PGS model, the number of SNVs in the PGS models from Non-additive GenoBoost, snpnet, snpboost, lassosum, C+T, LDpred, PRS-CS, and SBayesR, and the estimated additive heritability in liability scale on the primary fold for twelve UK Biobank phenotypes.

**File name:** Supplementary Data 3

**Description:** The list of all non-additive SNVs in Non-additive GenoBoost PGS model for psoriasis but not reported in GWAS catalog. The SNVs selected first in 1 million bp were shown. The top 5 SNVs were shown for psoriasis in Figure 4.
